# Supplementary material for: Common Infections and Antibiotic Prescribing during the First Year of the COVID-19 Pandemic: A Primary Care-Based Observational Cohort Study
Source: MDPI journal article supplement (doi:10.3390/antibiotics10121521), 2021-12-13
Supplement: s1 [file s1]

# Common Infections and Antibiotic Prescribing during the First Year of the COVID-19 Pandemic: A Primary Care-Based Observational Cohort Study

Josi A. Boeijen \*, Alike W. van der Velden, Saskia Hulleger, Tamara N. Platteel, Dorien L. M. Zwart, Roger A. M. J. Damoiseaux, Roderick P. Venekamp and Alma C. van de Pol

Julius Center for Health Sciences and Primary Care, University Medical Center Utrecht, Utrecht University, Heidelberglaan 100, 3584 CX Utrecht, The Netherlands; a.w.vandervelden@umcutrecht.nl (A.W.v.d.V.); s.hulleger@umcutrecht.nl (S.H.); T.N.Platteel-3@umcutrecht.nl (T.N.P.); D.Zwart@umcutrecht.nl (D.L.M.Z.); R.A.M.J.Damoiseaux@umcutrecht.nl (R.A.M.J.D.); R.P.Venekamp@umcutrecht.nl (R.P.V.); A.C.vandePol-11@umcutrecht.nl (A.C.v.d.P.)

\* Correspondence: j.a.boeijen@umcutrecht.nl

**Table S1.** Age and sex distribution Julius General Practitioners' Network cohort pre-pandemic and in the first pandemic year.

| Age Groups  |              | Male<br><i>n</i> =<br>(%) | Female<br><i>n</i> =<br>(%) | Other<br><i>n</i> =<br>(%) | Total<br><i>n</i> =<br>(%) |
|-------------|--------------|---------------------------|-----------------------------|----------------------------|----------------------------|
| 0–12        | Pre-pandemic | 34,324<br>(51.0)          | 32,938<br>(49.0)            | 1<br>(0.0)                 | 67,263<br>(100)            |
|             | Pandemic     | 34,288<br>(51.1)          | 32,870<br>(48.9)            | 1<br>(0.0)                 | 67,159<br>(100)            |
| 13–40       | Pre-pandemic | 84,519<br>(47.5)          | 93,307<br>(52.5)            | 3<br>(0.0)                 | 177,829<br>(100)           |
|             | Pandemic     | 86,412<br>(47.6)          | 95,164<br>(52.4)            | 3<br>(0.0)                 | 181,579<br>(100)           |
| 41–65       | Pre-pandemic | 63,782<br>(50.3)          | 63,137<br>(49.7)            | 0<br>(0.0)                 | 126,919<br>(100)           |
|             | Pandemic     | 64,598<br>(50.2)          | 64,040<br>(49.7)            | 0<br>(0.0)                 | 128,638<br>(100)           |
| >65         | Pre-pandemic | 23,895<br>(45.0)          | 29,218<br>(55.0)            | 1<br>(0.0)                 | 53,114<br>(100)            |
|             | Pandemic     | 24,737<br>(45.2)          | 30,002<br>(54.8)            | 1<br>(0.0)                 | 54,740<br>(100)            |
| Unknown Age | Pre-pandemic | 4<br>(100)                | 0<br>(0.0)                  | 0<br>(0.0)                 | 4<br>(100)                 |
|             | Pandemic     | 6<br>(100)                | 0<br>(0.0)                  | 0<br>(0.0)                 | 6<br>(100)                 |
| Total       | Pre-pandemic | 206,524<br>(48.6)         | 218,600<br>(51.4)           | 5<br>(0.0)                 | 425,129<br>(100)           |
|             | Pandemic     | 210,041<br>(48.6)         | 222,076<br>(51.4)           | 5<br>(0.0)                 | 432,122<br>(100)           |

**Table S2.** Age distribution for respiratory/ear, urinary tract, gastrointestinal and skin infection episodes, pre-pandemic and in the first pandemic year.

|                       |              | Median<br>Age (IQR) | Age Groups                |                            |                            |                          | Total             |
|-----------------------|--------------|---------------------|---------------------------|----------------------------|----------------------------|--------------------------|-------------------|
|                       |              |                     | 0–12<br><i>n</i> =<br>(%) | 13–40<br><i>n</i> =<br>(%) | 41–65<br><i>n</i> =<br>(%) | >65<br><i>n</i> =<br>(%) | <i>n</i> =<br>(%) |
| Respiratory tract/ear | Pre-pandemic | 34<br>(8-56)        | 20,588<br>(28.2)          | 22,209<br>(30.4)           | 18,714<br>(25.6)           | 11,578<br>(15.8)         | 73,089<br>(100)   |
|                       | Pandemic     | 39<br>(21-57)       | 10,265<br>(18.0)          | 19,695<br>(34.6)           | 18,292<br>(32.2)           | 8623<br>(15.2)           | 56,875<br>(100)   |
| Urinary tract         | Pre-pandemic | 50<br>(29-70)       | 1608<br>(6.3)             | 8837<br>(34.4)             | 7252<br>(28.2)             | 8006<br>(31.1)           | 25,703<br>(100)   |
|                       | Pandemic     | 51<br>(30-72)       | 1430<br>(6.3)             | 7559<br>(33.3)             | 6286<br>(27.7)             | 7415<br>(32.7)           | 22,690<br>(100)   |
| Gastrointestinal      | Pre-pandemic | 31<br>(8-60)        | 2910<br>(29.1)            | 3069<br>(30.7)             | 2018<br>(20.2)             | 1993<br>(19.9)           | 9990<br>(100)     |
|                       | Pandemic     | 39<br>(16-66)       | 1380<br>(23.5)            | 1654<br>(28.2)             | 1366<br>(23.3)             | 1470<br>(25.0)           | 5870<br>(100)     |
| Skin                  | Pre-pandemic | 32<br>(11-55)       | 3678<br>(26.4)            | 4694<br>(33.7)             | 3256<br>(23.4)             | 2315<br>(16.6)           | 13,943<br>(100)   |
|                       | Pandemic     | 35<br>(16-59)       | 2381<br>(22.5)            | 3523<br>(33.3)             | 2628<br>(24.8)             | 2048<br>(19.4)           | 10,580<br>(100)   |
| Total                 | Pre-pandemic | 36<br>(15-60)       | 28,784<br>(23.5)          | 38,809<br>(31.6)           | 31,240<br>(25.5)           | 23,892<br>(19.5)         | 122,725<br>(100)  |
|                       | Pandemic     | 41<br>(23-61)       | 15,456<br>(16.1)          | 32,431<br>(33.8)           | 28,572<br>(29.8)           | 19,556<br>(20.4)         | 96,015<br>(100)   |

Abbreviations: IQR = interquartile range.

**Table S3.** Sex distribution for respiratory/ear, urinary tract, gastrointestinal and skin infection episodes, pre-pandemic and in the first pandemic year.

|                       |              | Male<br><i>n</i> =<br>(%) | Female<br><i>n</i> =<br>(%) | Other<br><i>n</i> =<br>(%) | Total<br><i>n</i> =<br>(%) |
|-----------------------|--------------|---------------------------|-----------------------------|----------------------------|----------------------------|
|                       |              |                           |                             |                            |                            |
| Respiratory tract/ear | Pre-pandemic | 30,924<br>(42.3)          | 42,165<br>(57.7)            | 0<br>(0.0)                 | 73,089<br>(100)            |
|                       | Pandemic     | 24,427<br>(42.9)          | 32,447<br>(57.0)            | 1<br>(0.0)                 | 56,875<br>(100)            |
| Urinary tract         | Pre-pandemic | 5178<br>(20.1)            | 20,525<br>(79.9)            | 0<br>(0.0)                 | 25,703<br>(100)            |
|                       | Pandemic     | 4537<br>(20.0)            | 18,153<br>(80.0)            | 0<br>(0.0)                 | 22,690<br>(100)            |
| Gastrointestinal      | Pre-pandemic | 4187<br>(41.9)            | 5803<br>(58.1)              | 0<br>(0.0)                 | 9990<br>(100)              |
|                       | Pandemic     | 2414<br>(41.1)            | 3456<br>(58.9)              | 0<br>(0.0)                 | 5870<br>(100)              |
| Skin                  | Pre-pandemic | 6777<br>(48.6)            | 7165<br>(51.4)              | 1<br>(0.0)                 | 13,943<br>(100)            |
|                       | Pandemic     | 5062<br>(47.8)            | 5518<br>(52.2)              | 0<br>(0.0)                 | 10,580<br>(100)            |
| Total                 | Pre-pandemic | 47,066<br>(38.4)          | 75,658<br>(61.6)            | 1<br>(0.0)                 | 122,725<br>(100)           |
|                       | Pandemic     | 36,440<br>(38.0)          | 59,574<br>(62.0)            | 1<br>(0.0)                 | 96,015<br>(100)            |

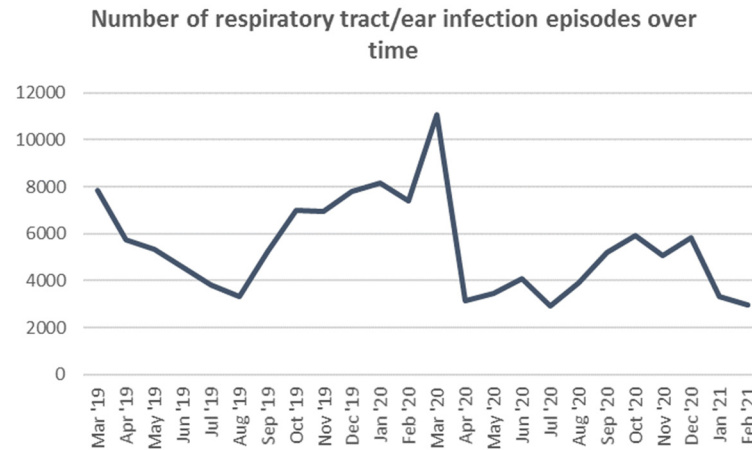

(a)

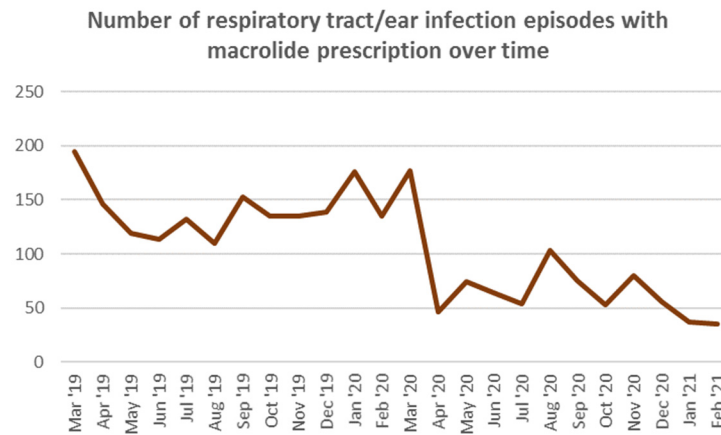

(b)

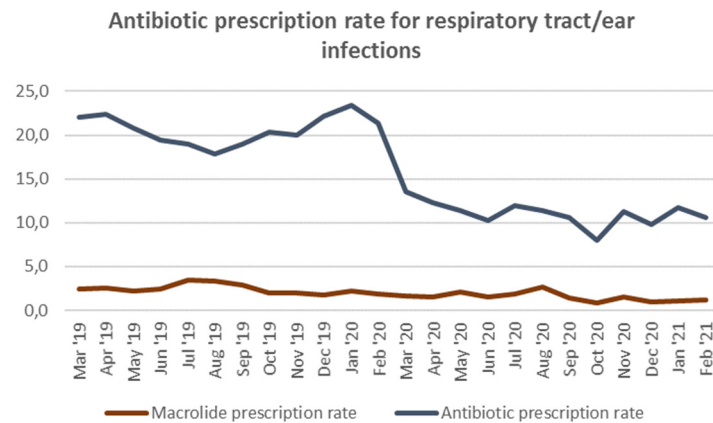

(c)

**Figure S1.** Macrolide prescription for respiratory infections over time: (a) number of respiratory tract/ear infection episodes over time; (b) number of respiratory tract/ear infection episodes with macrolide prescription over time; (c) antibiotic prescription rate for respiratory tract/ear infections.

## 0-12

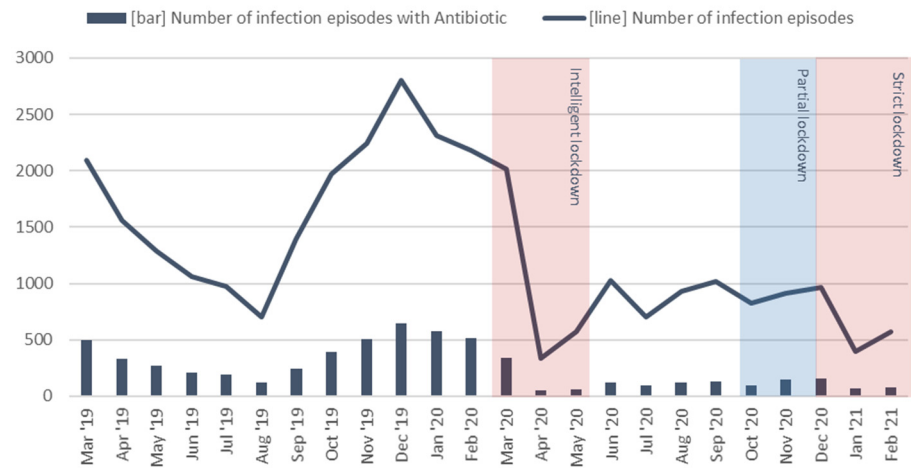

(a)

## 13-40

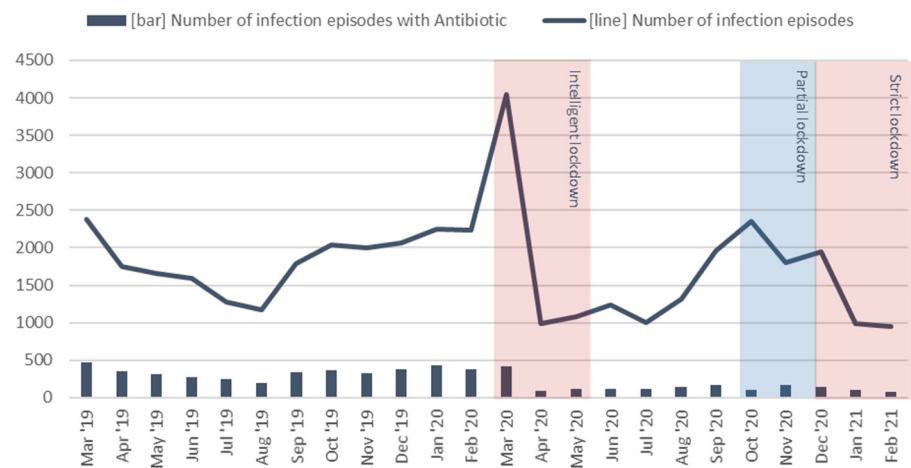

(b)

## 41-65

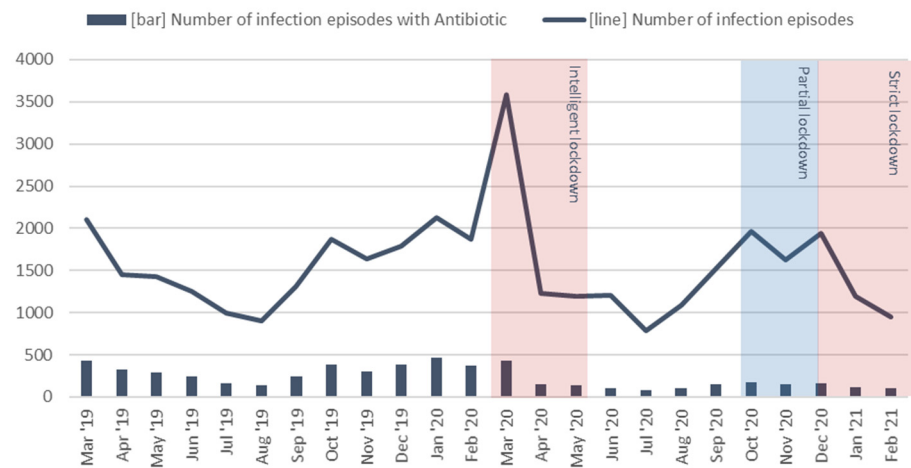

(c)

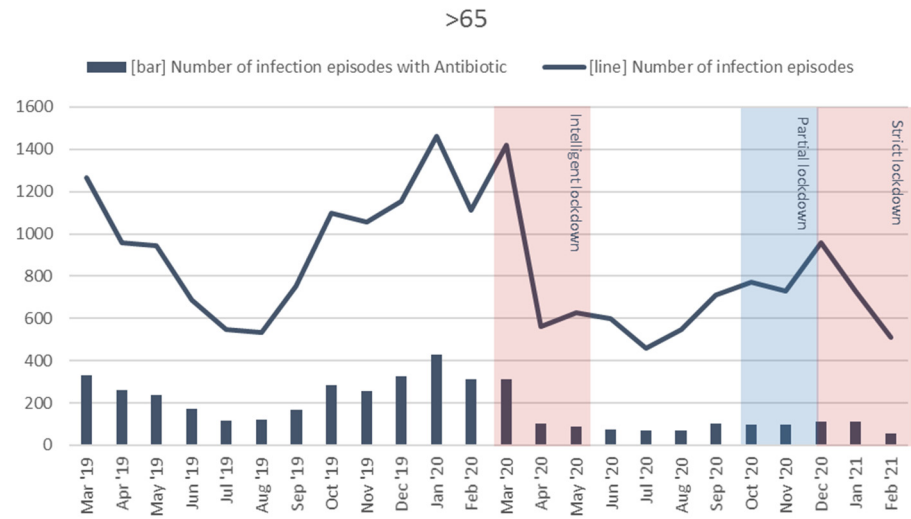

(d)

**Figure S2.** Number of respiratory and ear infection episodes and episodes with antibiotic prescription over time per age category: (a) 0–12, (b) 13–40, (c) 41–65, and (d) >65.
